# Supplementary material
Source: publisher figshare collection journal article supplement (https://acs.figshare.com/ndownloader/files/5174494)
Supplement: Supplementary file 1 [file 5174494]

**Table S1. Selected NMR  $^1\text{H}$  (273 K, 500 MHz,  $\text{CDCl}_3$ ),  $^{13}\text{C}$  (308 K, 100.56 MHz,  $\text{CDCl}_3$ ) and  $^{31}\text{P}$ -{ $^1\text{H}$ } (273 K, 101.2 MHz,  $\text{CDCl}_3$ ) data<sup>[a]</sup> ( $\delta$  in ppm) for allylic complexes 16-22.**

| Complex                           | central <sup>[b]</sup><br>[ <i>C</i> <sub>central</sub> ] | syn<br>[ <i>C</i> <sub>terminal</sub> ]             | anti                           | 3,3'                           | 4        | 5,5' |
|-----------------------------------|-----------------------------------------------------------|-----------------------------------------------------|--------------------------------|--------------------------------|----------|------|
| <b>16</b> <sup>[d]</sup><br>Major | 5.63(m)<br>[121.2]                                        | 5.08(t; 6.0)<br>3.52(bs)<br>[81.9]<br>[55.4]        | 3.62(bs)<br>2.65(d; 12.5)      | 4.38(dd; 9,7)<br>4.94(t; 9)    | 4.52(m)  | -    |
| <b>16</b> <sup>[d]</sup><br>Minor | 5.69(bs)<br>[121.1]                                       | 5.02(bs)<br>3.55(d; 3)<br>[81.4]<br>[55.4]          | 3.84(bt; 9.5)<br>2.45(d; 11.5) | 4.30(t; 8)<br>4.94(t; 9)       | 4.52(m)  | -    |
| <b>17</b><br>Major                | 5.66(m)<br>[121.6]                                        | 5.15(m)<br>4-3.4<br>[82.8]<br>[55.7]                | 4-3.4<br>2.68(d; 11.5)         | 4.39(pt; 7.5)<br>4.93(pt; 9.5) | 4.53(m)  | -    |
| <b>17</b><br>Minor                | 5.55(m)<br>[121.6]                                        | 5.04(m)<br>4-3.4<br>[82.3]<br>[53.9]                | 4-3.4<br>2.41(d; 11.5)         | 4.93(pt; 9.5)<br>4.31(m)       | 4.53(m)  | -    |
| <b>18</b> <sup>[d]</sup><br>Major | 5.82(m)<br>[122.7]                                        | 5.22(m)<br>3.65(d,5)<br>[82.6(d; 30)]<br>[55.4]     | 3.81(t,12.5)<br>2.83(d,12)     | 4.93(m)<br>4.31(pt,7)          | 4.59(m)  | -    |
| <b>18</b> <sup>[d]</sup><br>Minor | 5.82(m)<br>[120.1]                                        | 5.17(m)<br>3.72(bs)<br>[85.4]<br>[53.4]             | 4.08(t; 12.5)<br>2.74(d; 12)   | 4.93(m)<br>4.26(pt; 7)         | 4.59(m)  | -    |
| <b>19</b><br>Major                | 5.83(m)<br>[123.0]                                        | 5.19(m)<br>3.59(pd; 4.5)<br>[83.1(d; 32)]<br>[55.4] | 3.74(m)<br>2.84(d; 12)         | 4.82(t; 3.6)<br>4.36(m)        | 4.49(bm) | -    |
| <b>19</b><br>Minor                | 5.83(m)<br>[120.4]                                        | 5.07(m)<br>3.74(m)<br>[86.2(d; 32)]<br>[53.2]       | 4.10(m)<br>2.68(d; 12)         | 4.82(t; 3.6)<br>4.30(m)        | 4.49(bm) | -    |

|                          |                     |                                                         |                           |                             |          |                     |
|--------------------------|---------------------|---------------------------------------------------------|---------------------------|-----------------------------|----------|---------------------|
| <b>20</b> <sup>[e]</sup> |                     |                                                         |                           |                             |          |                     |
| Major                    | 5.52(bs)<br>[121.7] | 4.98(bs)<br>3.43(bs)<br>[82]<br>[50]                    | 3.72(bt)<br>2.62(d, 5.2)  | 4.82(bs)<br>4.22(bs)        | 4.46(bs) | -                   |
| <b>20</b> <sup>[e]</sup> |                     |                                                         |                           |                             |          |                     |
| Minor                    | 5.67(bs)<br>[118.8] | 4.98(bs)<br>3.62(bs)<br>[85]<br>[48]                    | 3.85(bt)<br>2.42(bd; 5.2) | 4.82(bs)<br>4.22(bs)        | 4.46(bs) | -                   |
| <b>21</b> <sup>[e]</sup> |                     |                                                         |                           |                             |          |                     |
| Major                    | 5.64(bs)<br>[124.7] | 5.01(bd; 15)<br>3.54(bs)<br>[82.6(d; 32)<br>[47.6]      | 3.78(bs)<br>2.60(bs)      | 4.71(bs)<br>4.41(bs)        | 4.56(bs) | -                   |
| <b>21</b> <sup>[e]</sup> |                     |                                                         |                           |                             |          |                     |
| Minor                    | 5.64(bs)<br>[123.1] | 5.01(bd,15)<br>3.58(bs)<br>[85.5(d; 30)]<br>[46.4]      | 4.03(bs)<br>2.50(bs)      | 4.71(bt)<br>4.41(bs)        | 4.56(bs) | -                   |
| <b>22</b>                |                     |                                                         |                           |                             |          |                     |
| Major                    | 5.09(m)<br>[137.9]  | 3.42(d, 6)<br>3.05(pt; 5.5)<br>[84(d; 28)]<br>[47.77]   | 3.30(m)<br>2.30(t; 11)    | 5.04(t; 10)<br>4.87(pq; 10) | 4.3-4.17 | 4.45-4.3<br>4.12(m) |
| <b>22</b>                |                     |                                                         |                           |                             |          |                     |
| Minor                    | 5.28(m)<br>[137.5]  | 3.50(pt)<br>3.32(d, 4.5)<br>[83.25(d; 27.8)]<br>[47.14] | 2.70(pq)<br>2.30(t; 6)    | 4.90(t; 6)<br>4.50(pq)      | 4.3-4.17 | 4.45-4.3<br>4.01(m) |

[a] Multiplicity (d, doublet; q, quartet; s, singlet; t, triplet; bs, broad signal; m, multiplet), coupling constants in Hz In brackets, <sup>13</sup>C chemical shifts. [b] See figure below for atom labels. [c] In brackets, <sup>31</sup>P chemical shift for free ligand. [d] Spectrum registered at 308 K. [e] The spectrum presents broad signals even at low temperature. [f] Signals overlapped with cyclohexyl group protons. [g] Unique signal at 308 K

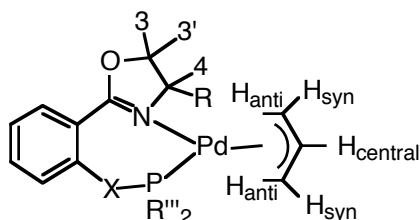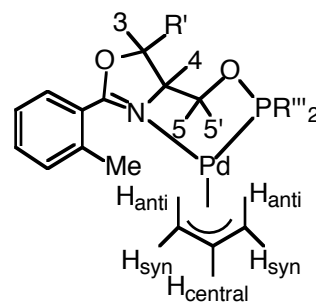

**Table S2. Selected NMR  $^1\text{H}$  (273 K, 500 MHz,  $\text{CDCl}_3$ ),  $^{13}\text{C}$  (308 K, 100.56 MHz,  $\text{CDCl}_3$ ) and  $^{31}\text{P}$ - $\{^1\text{H}\}$  (273 K, 101.2 MHz,  $\text{CDCl}_3$ ) data<sup>[a]</sup> ( $\delta$  in ppm) for allylic complexes **23**, **24**, **25** and **26**.**

| Complex <sup>[b]</sup> | central <sup>[c]</sup><br>[C <sub>central</sub> ] | anti<br>[C <sub>terminal</sub> ]                                     | 3, 3'                            | 4                     | 5, 5'                             |                                          |
|------------------------|---------------------------------------------------|----------------------------------------------------------------------|----------------------------------|-----------------------|-----------------------------------|------------------------------------------|
| <b>23</b>              |                                                   |                                                                      |                                  |                       |                                   |                                          |
| Major (70)             | 6.7 <sup>[e]</sup><br>[109.3]                     | 5.63(dd; 13.9)<br>4.23(d; 11)<br>[99.5 (d; 12.6)]<br>[71.7]          | 4.08(dd; 8.5,7)<br>3.95(t; 9.5)  | 2.50(dt; 9.5,3.5)     | -                                 | R=C<br>CH <sub>3</sub> =<br>0.50<br>CH=  |
| <b>23</b>              |                                                   |                                                                      |                                  |                       |                                   |                                          |
| Minor (30)             | 6.2 <sup>[e]</sup><br>[110.4]                     | 5.46(t; 11.5)<br>5.37(d; 12.5)<br>[92.8]<br>[77.8]                   | 4.03(dd; 9, 5.5)<br>3.24(t; 9.5) | 3.86(pq; 5)           | -                                 | R=C<br>CH <sub>3</sub> =C<br>0.62<br>CH= |
| <b>24</b>              |                                                   |                                                                      |                                  |                       |                                   |                                          |
| Major (80)             | 6.59(dd; 14,11)<br>[112.6(d; 7.0)]                | 5.74(dd; 29,10)<br>4.47(d; 11)<br>[104.4(d; 23)]<br>[62.2]           | 4.05(m)<br>3.80(t; 9.5)          | 2.8(m)                | -                                 | R=C<br>CH <sub>3</sub> =<br>0.61<br>(    |
| <b>24</b>              |                                                   |                                                                      |                                  |                       |                                   |                                          |
| Minor (20)             | 6.37(t; 12.5)<br>[112.1(d; 5)]                    | 5.58(t; 11.5)<br>5.23(d; 12)<br>[95.7(d; 25)]<br>[79.9]              | 4.05(m)<br>3.00(t; 8.5)          | 3.99(m)               | -                                 | R=C<br>CH <sub>3</sub> =<br>0.6<br>(     |
| <b>25</b>              |                                                   |                                                                      |                                  |                       |                                   |                                          |
| Major (55)             | 6.28-6.12(m)<br>[109.8]                           | 6.39(t; 11)<br>4.66(d; 10)<br>[103.4]<br>[71.9]                      | 5.05(d; 5)                       | 4.4(m)                | 4.37(bdd; 26,13)<br>3.92-3.74(bm) |                                          |
| <b>25</b>              |                                                   |                                                                      |                                  |                       |                                   |                                          |
| Minor (45)             | 6.28-6.12(m)<br>[11.3]                            | 5.25(d; 10)<br>4.71(t; 12.5)<br>[95.6]<br>[72.21]                    | 5.40(d; 10)                      | 4.57(m)               | 4.85(bm)<br>3.92-3.74(bm)         |                                          |
| <b>26</b>              |                                                   |                                                                      |                                  |                       |                                   |                                          |
| Major (75)             | 6.36 (t; 2.5)<br>[111.41(d; 6.1)]                 | 5.03 (d; 2)<br>151.5<br>4.77(t; 12.5)<br>[96.46(d; 26.7)]<br>[73.67] | 5.16 (d; 5)                      | 4.08 (ddd; 0.5,5,2.5) | 4.35(ddd;<br>4.03(d; 3.5)         |                                          |
| <b>26</b>              |                                                   |                                                                      |                                  |                       |                                   |                                          |
| Minor (25)             | non observed                                      | 4.47(d; 10)<br>Only one proton observed<br>[85.7]<br>[104.5]         | 5.35(d; 9.5)                     | 4.47(bs)              | 4.01-3.98(m)                      |                                          |

[a] Multiplicity (s, singlet; d, doublet; t, triplet; q, quartet; m, multiplet; b, broad signal) coupling constants (in Hz). In brackets,  $^{13}\text{C}$  chemical shifts. [b] In parentheses ratio of isomers. [c] See Table S1 for labelling. [d] In brackets,  $^{31}\text{P}$  chemical shift for free ligand. [e] Signal overlapped with aromatic protons. [f] Signal overlapped with cyclohexenyl protons.
